# Supplementary material for: Unprecedented Diversity of Lactococcal Group 936 Bacteriophages Revealed by Amplicon Sequencing of the Portal Protein Gene
Source: MDPI journal article supplement (doi:10.3390/v11050443), 2019-05-16
Supplement: s1 [file s1]

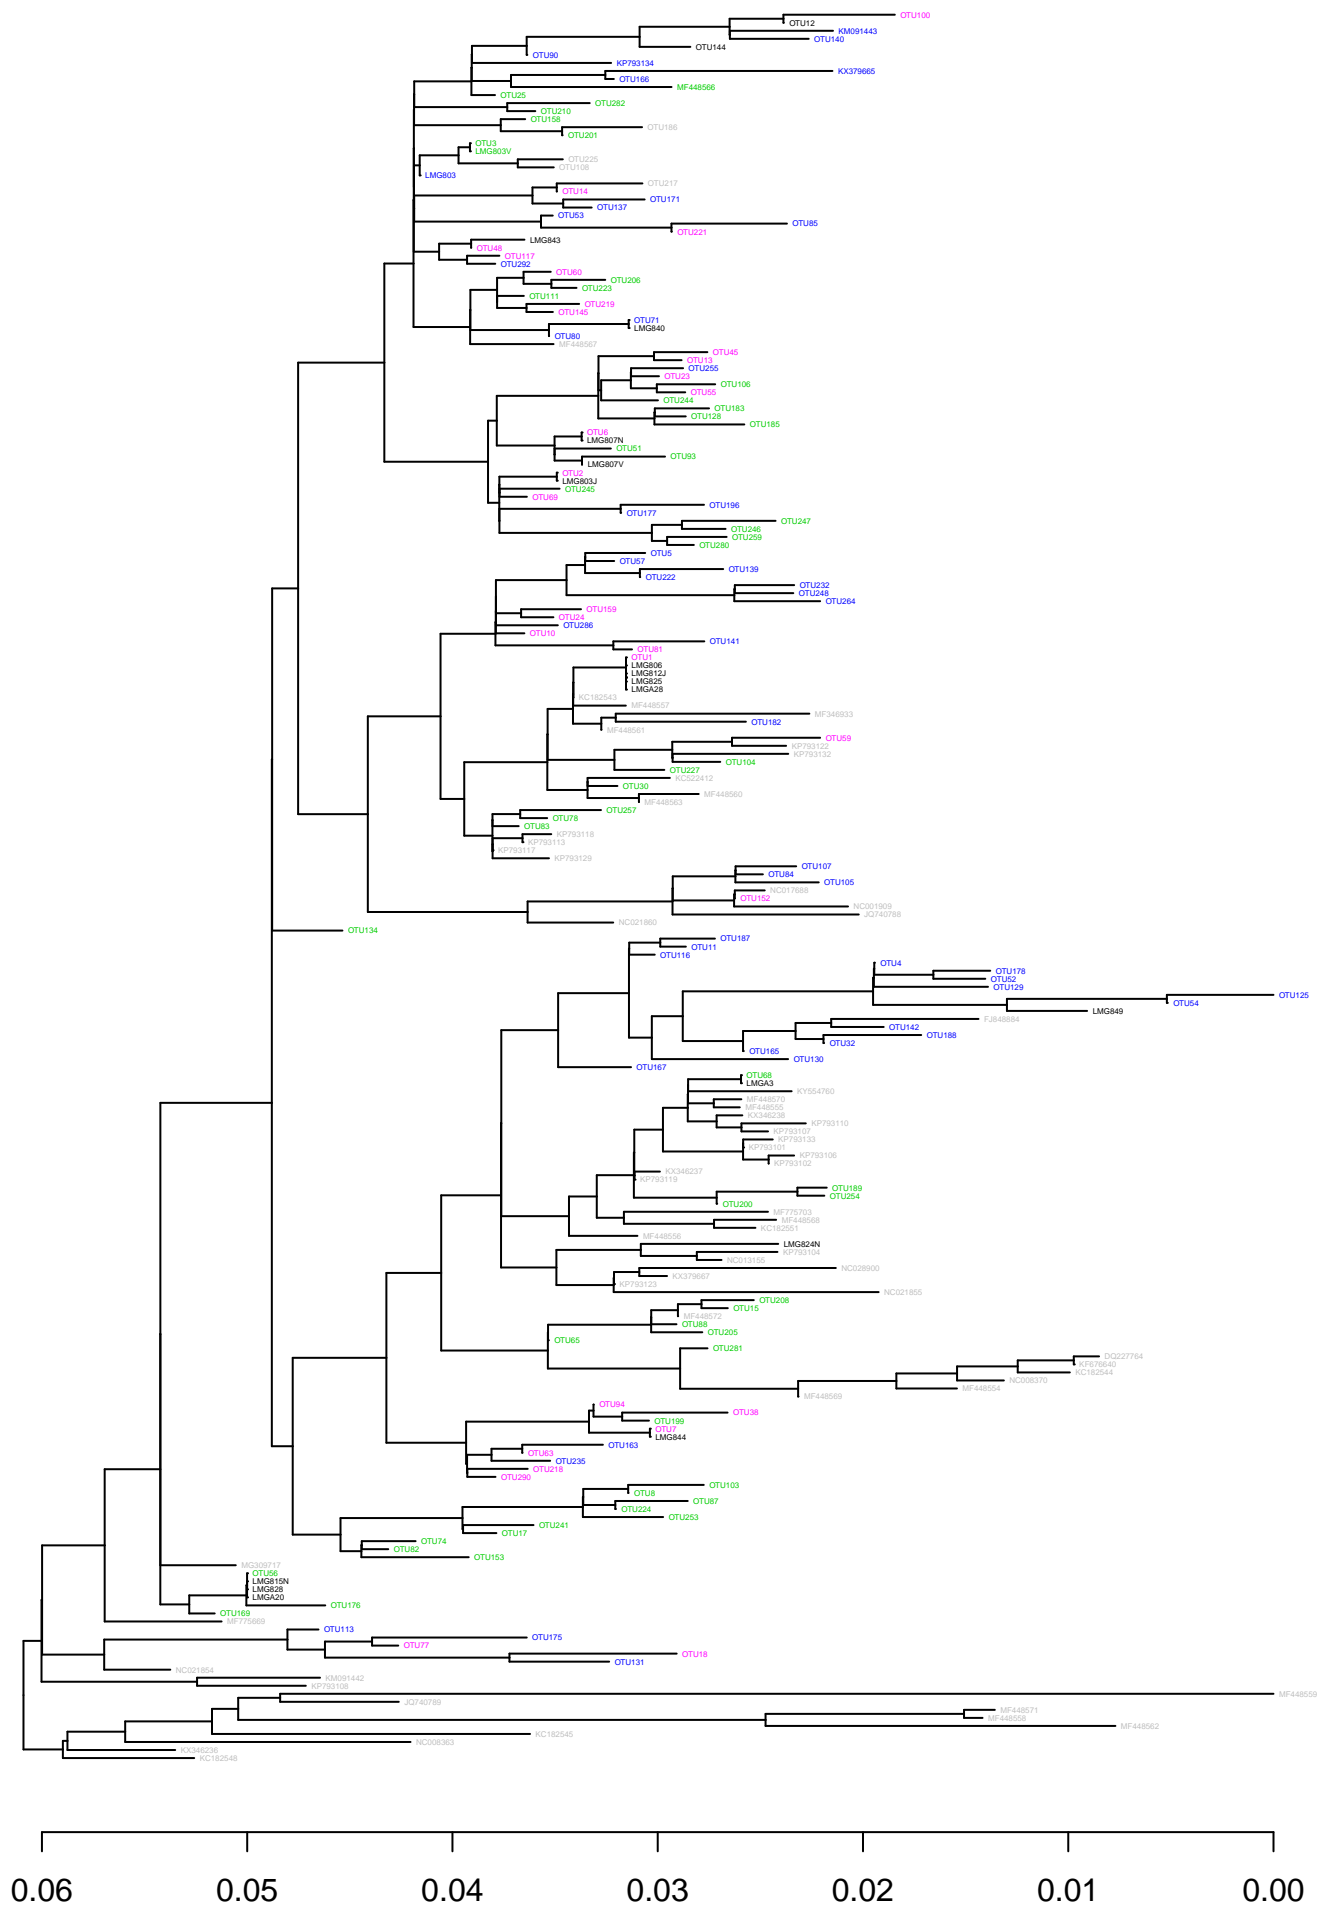

## Figure S2

Phylogeny of OTUs from Norwegian cheese production and published 936 phage genome sequences and OTUs inferred from genome sequences of 936 phages. OTUs only found in dairy 1 is shown in green, OTUs only found in dairy 2 is shown in blue, OTUs found in both dairy plants are shown in pink. OTUs representing phages isolated in this work are shown in black. OTUs representing published phage genome sequences (66 unique OTUs) are shown in grey. The published sequences are represented by their accession numbers.
