# Supplementary material for: Unprecedented Diversity of Lactococcal Group 936 Bacteriophages Revealed by Amplicon Sequencing of the Portal Protein Gene
Source: MDPI journal article supplement (doi:10.3390/v11050443), 2019-05-16
Supplement: s1 [file s1]

| <b>Sample</b> | <b>Genome Size<br/>(bp)</b> | <b>Number of<br/>CDS</b> |
|---------------|-----------------------------|--------------------------|
| LMGA3         | 31,219                      | 55                       |
| LMGA20        | 31,721                      | 58                       |
| LMGA28        | 30,299                      | 54                       |
| LMG803        | 28,890                      | 53                       |
| LMG803J       | 30,328                      | 53                       |
| LMG803V       | 29,738                      | 54                       |
| LMG806        | 30,603                      | 53                       |
| LMG807N       | 28,785                      | 50                       |
| LMG807V       | 30,370                      | 55                       |
| LMG812J       | 30,508                      | 53                       |
| LMG815N       | 31,728                      | 58                       |
| LMG824N       | 32,980                      | 60                       |
| LMG825        | 30,730                      | 55                       |
| LMG828        | 32,466                      | 59                       |
| LMG840        | 28,522                      | 54                       |
| LMG843        | 30,458                      | 54                       |
| LMG844        | 30,188                      | 55                       |
| LMG849        | 31,397                      | 62                       |

Table S1. Genomes of bacteriophages isolated in this study.

| <b>ORF</b> | <b>Product</b>                         | <b>Minimum<br/>Pairwise<br/>Identity</b> | <b>ORF Size (min-max)</b> |
|------------|----------------------------------------|------------------------------------------|---------------------------|
| ORF1       | Terminase small subunit                | 94.1%                                    | 522-528                   |
| ORF2       | Terminase large subunit                | 93.4%                                    | 1623-1629                 |
| ORF3       | HNH endonuclease                       | 95.0%                                    | 255-285                   |
| ORF4       | portal protein                         | 94.4%                                    | 1116-1167                 |
| ORF5       | putative head protease                 | 94.6%                                    | 501-576                   |
| ORF6       | major capsid protein                   | 94.6%                                    | 1068-1182                 |
| ORF7       | putative structural protein            | 97.1%                                    | 264-264                   |
| ORF8       | putative structural protein 2          | 93.8%                                    | 315-315                   |
| ORF9       | structural protein 3                   | 94.4%                                    | 294-342                   |
| ORF10      | putative structural protein 4          | 92.9%                                    | 318-366                   |
| ORF11      | major tail protein                     | 88.6%                                    | 657-906                   |
| ORF12      | putative structural protein 5          | 94.3%                                    | 276-276                   |
| ORF13      | putative structural protein 6          | 96.4%                                    | 513-513                   |
| ORF14      | tape measure protein                   | 76.5%                                    | 2493-3120                 |
| ORF15      | tail length tape measure protein       | 69.4%                                    | 747-1878                  |
| ORF18      | receptor binding protein               | 71.5%                                    | 759-870                   |
| ORF19      | holin                                  | 90.2%                                    | 276-354                   |
| ORF20      | lysin                                  | 74.4%                                    | 681-786                   |
| ORF21      | hypothetical protein                   | 92.8%                                    | 261-279                   |
| ORF23      | hypothetical protein                   | 85.5%                                    | 189-348                   |
| ORF32      | hypothetical protein                   | 88.9%                                    | 384-534                   |
| ORF33      | hypothetical protein                   | 93.8%                                    | 213-246                   |
| ORF34      | single-stranded DNA binding<br>protein | 89.6%                                    | 345-360                   |
| ORF38      | hypothetical protein                   | 87.0%                                    | 252-411                   |
| ORF39      | hypothetical protein                   | 90.7%                                    | 202-249                   |
| ORF41      | hypothetical protein                   | 90.4%                                    | 243-279                   |
| ORF52      | holiday junction endonuclease          | 92.7%                                    | 132-132                   |
| ORF53      | holiday junction endonuclease          | 91.9%                                    | 480-492                   |
| ORF54      | middle expressed protein 4             | 92.1%                                    | 162-168                   |

Table S2. Core genome of group 936 bacteriophages. The ORFs are number according to numbering in bacteriophage sk1.
