# Supplementary material for: Unprecedented Diversity of Lactococcal Group 936 Bacteriophages Revealed by Amplicon Sequencing of the Portal Protein Gene
Source: MDPI journal article supplement (doi:10.3390/v11050443), 2019-05-16
Supplement: s1 [file s1]

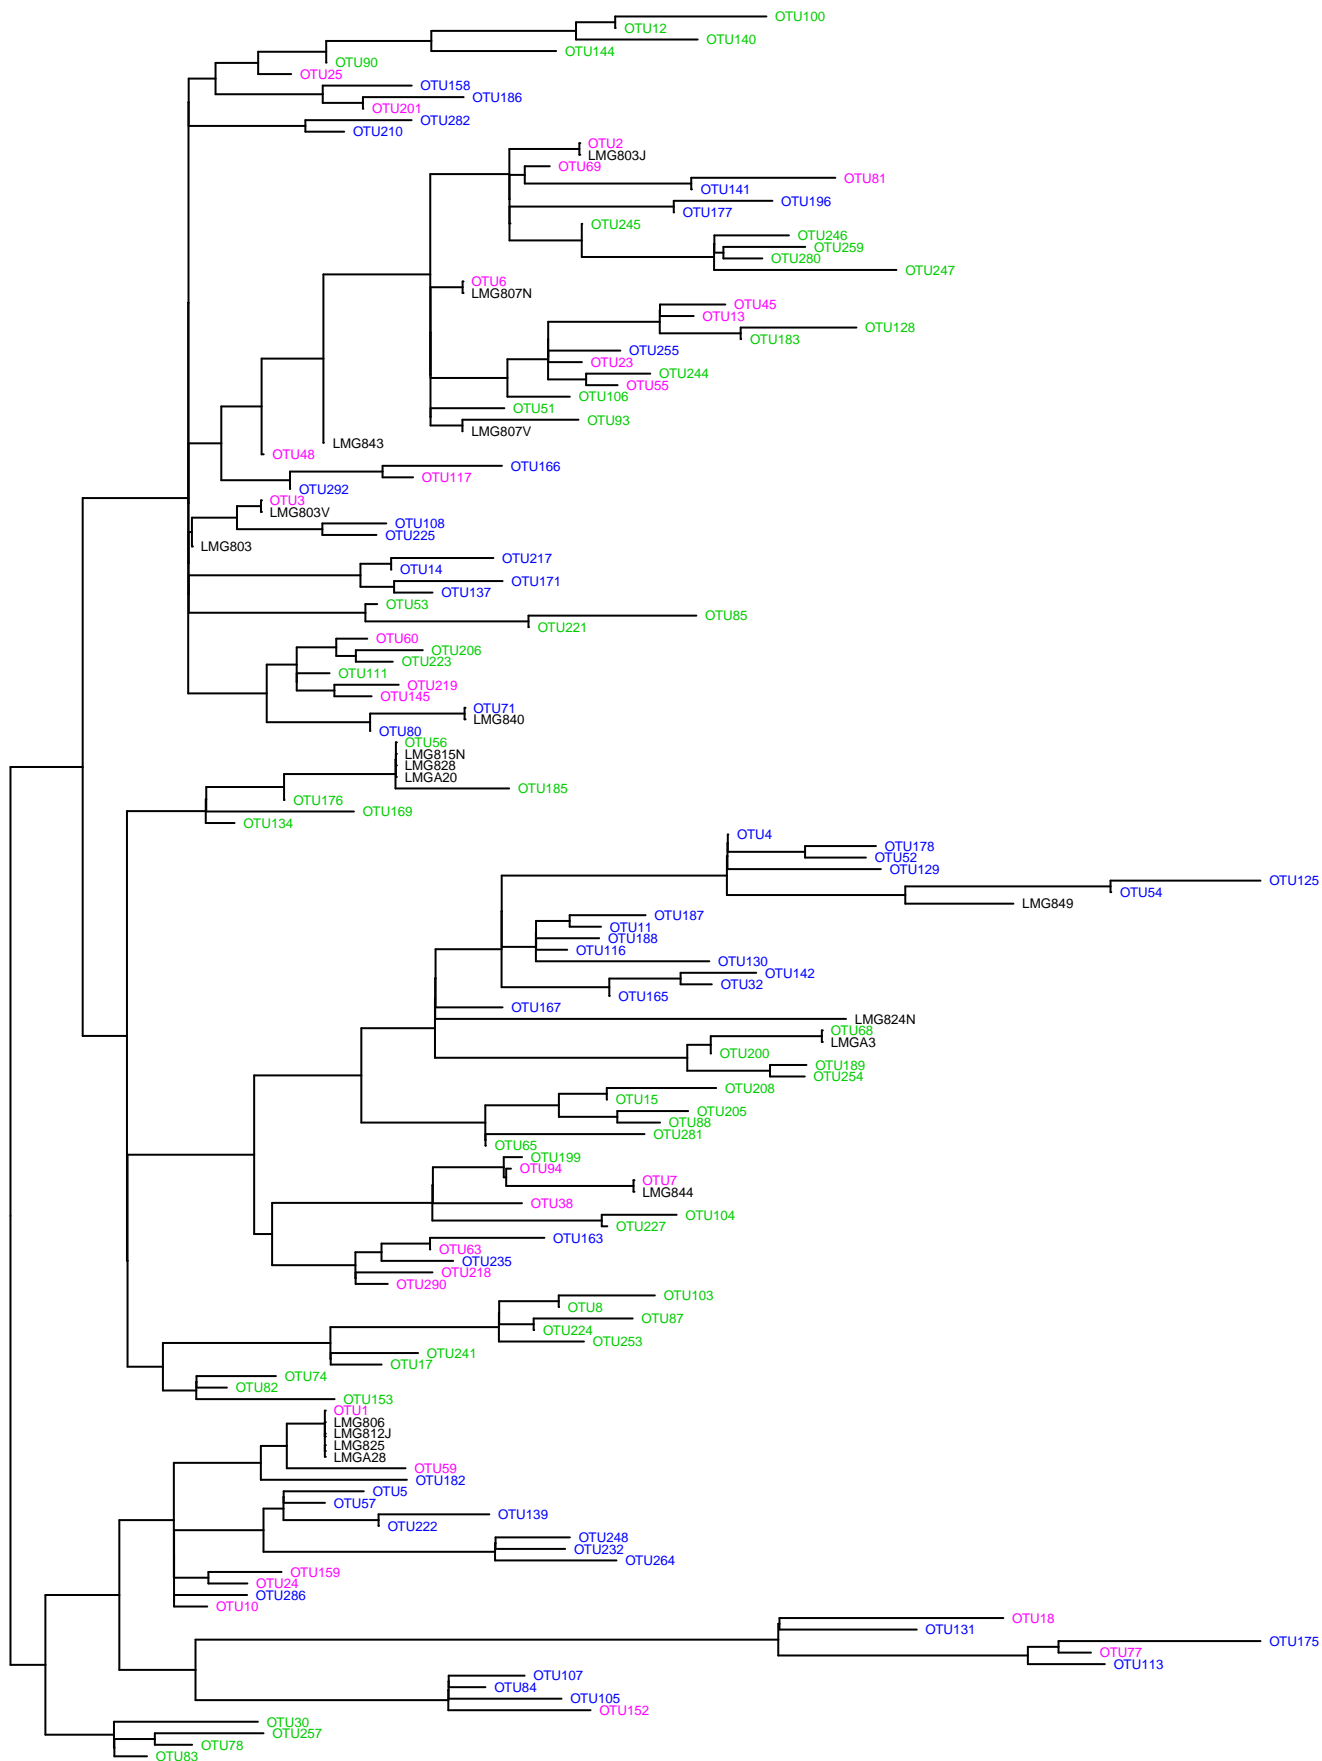

0.04

0.03

0.02

0.01

0.00

## Figure S1

Phylogeny of OTUs from Norwegian cheese production. OTUs inferred from genome sequences of phages isolated in this work are included. OTUs only found in dairy 1 is shown in green, OTUs only found in dairy 2 is shown in blue, OTUs found in both dairy plants are shown in pink. OTUs representing phages isolated in this work are shown in black.
